# Supplementary material for: Dietary Strategies to Reduce Triglycerides in Women of Reproductive Age: A Simulation Modelling Study
Source: MDPI journal article supplement (doi:10.3390/nu15245137), 2023-12-18
Supplement: s1 [file s1]

**Figure S1:** Participant flow.

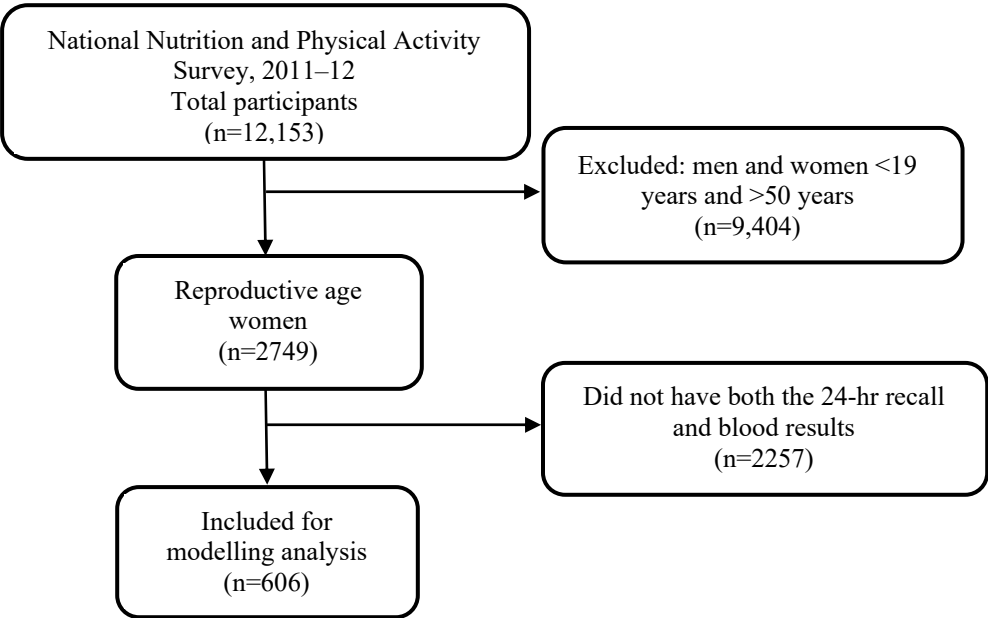

**Table S1:** Characteristics of included and excluded participants.

|                                            | <b>Included<br/>participants<br/>(n=606)</b> | <b>Excluded<br/>participants<br/>(n=1540)</b> |
|--------------------------------------------|----------------------------------------------|-----------------------------------------------|
| Age (years): Mean (SD)                     | 36.38 (8.16)                                 | 34.86 (8.62)                                  |
| BMI (kg/m <sup>2</sup> ): Mean (SD)        | 26.56 (6.32)                                 | 26.63 (6.11)                                  |
| HDL (mmol/L): Mean (SD)                    | 1.47 (0.36)                                  | -                                             |
| Fasting plasma glucose (mmol/L): Mean (SD) | 4.85 (0.71)                                  | -                                             |
| Triglycerides (mmol/L): Median (IQR)       | 0.90 (0.70 – 1.20)                           | 1.00 (0.80 – 1.30)                            |
| Smoking status: n (%)                      |                                              |                                               |
| Never smoked                               | 362 (59.74)                                  | 827 (53.7)                                    |
| Ex-smoker                                  | 165 (27.23)                                  | 335 (21.75)                                   |
| Current smoker                             | 79 (13.04)                                   | 378 (24.55)                                   |
| Country of birth: n (%)                    |                                              |                                               |
| Australia/New Zealand                      | 443 (73.1)                                   | 1195 (77.6)                                   |
| Other                                      | 163 (26.9)                                   | 345 (22.4)                                    |
| Family history of diabetes: n (%)          |                                              |                                               |
| No                                         | 427 (70.46)                                  | 1136 (73.77)                                  |
| Yes                                        | 179 (29.54)                                  | 404 (26.23)                                   |

SD: standard deviation; IQR: interquartile range

**Table S2:** Model coefficients from the triglycerides model.

| Variable                               | Coefficients |
|----------------------------------------|--------------|
| (Intercept)                            | -1.0190      |
| Glycemic index                         | 0.0049       |
| Smoking status: ex-smoker              | 0.0374       |
| Smoking status: current smoker         | 0.2110       |
| Body mass index                        | 0.0160       |
| High density lipoprotein cholesterol   | -0.1945      |
| Glucose                                | 0.1184       |
| Energy                                 | -0.0002      |
| Carbohydrate without sugar and alcohol | 0.0126       |
| Starch                                 | -0.0093      |
| Sugar                                  | -0.0108      |
| Alcohol                                | 0.0044       |
| Retinol equivalents                    | 0.0000       |
| Vitamin B1                             | -0.0050      |
| Vitamin B2                             | 0.0059       |
| Vitamin B3                             | 0.0021       |
| Folic acid                             | -0.0002      |
| Vitamin B6                             | 0.0013       |
| Iodine                                 | 0.0004       |
| Potassium                              | 0.0001       |
| Caffeine                               | -0.0003      |
| Saturated fat                          | 0.0131       |
| Monounsaturated fat                    | 0.0065       |
| Trans fatty acids                      | -0.0001      |

**Table S3:** Predicted triglycerides and their 95% CI's following each scenario

| <b>Scenario</b>                                                                                                                                       | <b>Predicted triglyceride level (95% CI)</b> |
|-------------------------------------------------------------------------------------------------------------------------------------------------------|----------------------------------------------|
| Baseline, original intakes                                                                                                                            | 0.935 (0.893, 0.979)                         |
| Scenario 1. Reduce NOVA processed and ultra-processed foods (PF): the base model                                                                      | 0.933 (0.878, 0.991)                         |
| Scenario 2, model 1. Base model + replace PF with NOVA unprocessed/minimally processed foods, by 25%                                                  | 0.924 (0.873, 0.978)                         |
| Scenario 2, model 2. Base model + replace PF with NOVA unprocessed/minimally processed foods, by 50%                                                  | 0.915 (0.865, 0.968)                         |
| Scenario 2, model 3. Base model + replace PF with NOVA unprocessed/minimally processed foods, by 75%                                                  | 0.909 (0.858, 0.963)                         |
| Scenario 3a, model 1. Base model + replace PF with high omega 3 fish, by 40 g/d                                                                       | 0.914 (0.864, 0.967)                         |
| Scenario 3a, model 2. Base model + replace PF with high omega 3 fish, by 80 g/d                                                                       | 0.895 (0.846, 0.947)                         |
| Scenario 3a, model 3. Base model + replace PF with high omega 3 fish, by 120 g/d                                                                      | 0.878 (0.827, 0.931)                         |
| Scenario 3a, model 4. Base model + replace PF with high omega 3 fish, by 160 g/d                                                                      | 0.860 (0.806, 0.918)                         |
| Scenario 3a, model 5. Base model + replace PF with high omega 3 fish, by 200 g/d                                                                      | 0.842 (0.783, 0.906)                         |
| Scenario 3b, model 1. Base model + replace PF with nuts, by 10g/d                                                                                     | 0.924 (0.871, 0.980)                         |
| Scenario 3b, model 2. Base model + replace PF with nuts, by 20g/d                                                                                     | 0.915 (0.862, 0.971)                         |
| Scenario 3b, model 3. Base model + replace PF with nuts, by 30g/d                                                                                     | 0.906 (0.853, 0.963)                         |
| Scenario 3b, model 4. Base model + replace PF with nuts, by 40g/d                                                                                     | 0.899 (0.844, 0.958)                         |
| Scenario 4a, model 1. Base model + increase gram intake of vegetables by 75 g/d                                                                       | 0.935 (0.880, 0.993)                         |
| Scenario 4a, model 2. Base model + increase gram intake of vegetables by 150 g/d                                                                      | 0.936 (0.880, 0.995)                         |
| Scenario 4a, model 3. Base model + increase gram intake of vegetables by 225 g/d                                                                      | 0.936 (0.879, 0.997)                         |
| Scenario 4a, model 4. Base model + increase gram intake of vegetables by 300 g/d                                                                      | 0.940 (0.881, 1.003)                         |
| Scenario 4b, model 1. Base model + increase gram intake of fruit by 75 g/d                                                                            | 0.927 (0.873, 0.984)                         |
| Scenario 4b, model 2. Base model + increase gram intake of fruit by 150 g/d                                                                           | 0.922 (0.868, 0.979)                         |
| Scenario 4b, model 3. Base model + increase gram intake of fruit by 225 g/d                                                                           | 0.920 (0.865, 0.978)                         |
| Scenario 4b, model 4. Base model + increase gram intake of fruit by 300 g/d                                                                           | 0.915 (0.859, 0.975)                         |
| Scenario 5, model 1. Base scenario + increase fruit by 225 g/d, vegetables by 225 g/d, nuts by 10 g/d                                                 | 0.924 (0.864, 0.988)                         |
| Scenario 5, model 2. Base scenario + increase fruit by 225 g/d, vegetables by 225 g/d, nuts by 20 g/d                                                 | 0.916 (0.856, 0.980)                         |
| Scenario 5, model 3. Base scenario + increase fruit by 150 g/d, vegetables by 150 g/d, nuts by 10 g/d                                                 | 0.922 (0.866, 0.981)                         |
| Scenario 5, model 4. Base scenario + increase fruit by 150 g/d, vegetables by 225 g/d, nuts by 20 g/d                                                 | 0.912 (0.855, 0.972)                         |
| Scenario 5, model 5. Base scenario + increase fruit by 150 g/d, vegetables by 225 g/d, nuts by 30 g/d                                                 | 0.903 (0.847, 0.964)                         |
| Scenario 5, model 6. Base scenario + increase fruit by 150 g/d, vegetables by 225 g/d, nuts by 40 g/d                                                 | 0.895 (0.836, 0.957)                         |
| Scenario 5, model 7. Base scenario + increase fruit by 150 g/d, vegetables by 150 g/d, nuts by 40 g/d                                                 | 0.897 (0.840, 0.959)                         |
| Scenario 5, model 8. Base scenario + increase fruit by 150 g/d, vegetables by 150 g/d, nuts by 30 g/d                                                 | 0.906 (0.850, 0.966)                         |
| Scenario 6. Replace oils with high SFA content (e.g. butter, dairy blend) with healthier alternatives (e.g. flaxseed, olive, canola, and sesame oils) | 0.933 (0.878, 0.991)                         |
| Scenario 7, model 1. Base scenario + increase fruit by 150 g/d, vegetables by 225 g/d, nuts by 30 g/d, high omega 3 fish by 40 g/d                    | 0.886 (0.830, 0.945)                         |
| Scenario 7, model 2. Base scenario + increase fruit by 150 g/d, vegetables by 225 g/d, nuts by 30 g/d, high omega 3 fish by 80 g/d                    | 0.868 (0.812, 0.927)                         |
| Scenario 7, model 3. Base scenario + increase fruit by 150 g/d, vegetables by 225 g/d, nuts by 30 g/d, high omega 3 fish by 120 g/d                   | 0.850 (0.791, 0.913)                         |

|                                                                                                                                     |                      |
|-------------------------------------------------------------------------------------------------------------------------------------|----------------------|
| Scenario 7, model 4. Base scenario + increase fruit by 150 g/d, vegetables by 225 g/d, nuts by 40 g/d, high omega 3 fish by 40 g/d  | 0.877 (0.820, 0.939) |
| Scenario 7, model 5. Base scenario + increase fruit by 150 g/d, vegetables by 225 g/d, nuts by 40 g/d, high omega 3 fish by 80 g/d  | 0.858 (0.799, 0.921) |
| Scenario 7, model 6. Base scenario + increase fruit by 150 g/d, vegetables by 225 g/d, nuts by 40 g/d, high omega 3 fish by 120 g/d | 0.841 (0.779, 0.908) |

**Table S4:** Estimated nutrient profile following a decrease in PF<sup>1</sup> by 50% and increasing high omega 3 fish by 80 g/d.

| Nutrient                            | All food intake, baseline | Modelled intakes | Total PF <sup>1</sup> | MP <sup>2</sup> | PCI <sup>3</sup> | Fish (>800 mg/100 g) |
|-------------------------------------|---------------------------|------------------|-----------------------|-----------------|------------------|----------------------|
| Energy including fibre (kJ)         | 7661.4                    | 5961.3           | 2590.6                | 2210.7          | 245.0            | 915.0                |
| Protein (g)                         | 79.1                      | 76.8             | 23.4                  | 31.8            | 0.1              | 21.7                 |
| Fat (g)                             | 67.1                      | 58.7             | 22.8                  | 17.5            | 3.6              | 14.8                 |
| CHO (g)                             | 203.0                     | 133.1            | 69.9                  | 56.3            | 6.8              | 0.0                  |
| Sugars (g)                          | 94.0                      | 65.9             | 28.1                  | 31.1            | 6.8              | 0.0                  |
| Added sugars (g)                    | 46.5                      | 26.5             | 20.0                  | 0.9             | 5.6              | 0.0                  |
| Free sugars (g)                     | 53.0                      | 32.0             | 21.0                  | 4.2             | 6.8              | 0.0                  |
| Fibre (g)                           | 20.6                      | 14.6             | 5.9                   | 8.7             | 0.0              | 0.0                  |
| Alcohol (g)                         | 9.1                       | 4.5              | 4.5                   | 0.0             | 0.0              | 0.0                  |
| Retinol equivalents (µg)            | 779.1                     | 652.4            | 175.7                 | 412.1           | 14.1             | 50.4                 |
| Total folate equivalents (µg)       | 532.0                     | 343.6            | 189.8                 | 152.2           | 0.2              | 1.4                  |
| Vitamin B12 (µg)                    | 3.8                       | 4.6              | 0.9                   | 1.8             | 0.0              | 1.8                  |
| Calcium (mg)                        | 760.8                     | 554.1            | 216.3                 | 325.6           | 2.3              | 9.9                  |
| Iodine (µg)                         | 153.0                     | 126.7            | 44.4                  | 63.2            | 0.4              | 18.7                 |
| Iron (mg)                           | 9.6                       | 7.3              | 3.3                   | 3.0             | 0.0              | 1.0                  |
| Sodium (mg)                         | 2210.2                    | 1347.7           | 915.5                 | 345.3           | 32.4             | 54.5                 |
| Zinc (mg)                           | 9.3                       | 7.1              | 2.7                   | 3.8             | 0.0              | 0.6                  |
| Saturated fat (g)                   | 25.2                      | 19.5             | 9.0                   | 6.1             | 1.1              | 3.3                  |
| Monounsaturated fat (g)             | 25.5                      | 22.9             | 8.5                   | 7.0             | 1.4              | 6.1                  |
| Linoleic acid (g)                   | 8.8                       | 7.0              | 3.0                   | 2.1             | 0.7              | 1.2                  |
| Alpha linolenic acid (g)            | 1.3                       | 1.2              | 0.5                   | 0.2             | 0.1              | 0.4                  |
| Long chain omega 3 fatty acids (mg) | 233.1                     | 2045.4           | 57.9                  | 64.5            | 1.5              | 1921.6               |
| Glycemic Index                      | 54.8                      | 54.1             | 55.9                  | 50.9            | 63.2             | 0.0                  |
| Glycemic Load                       | 110.7                     | 71.7             | 39.0                  | 28.4            | 4.3              | 0.0                  |

<sup>1</sup>Including ultra-processed and processed foods; <sup>2</sup>Unprocessed/minimally processed foods other than high omega 3 fish; <sup>3</sup>Processed culinary ingredients

**Table S5:** Estimated nutrient profile following a decrease in PF<sup>1</sup> by 50% and increasing nuts by 10 g/d and 30 g/d.

| Nutrient                            | Modelled intakes | Nuts, 10 g/d | Modelled intakes | Nuts, 30 g/d |
|-------------------------------------|------------------|--------------|------------------|--------------|
| Energy including fibre (kJ)         | 5309.5           | 310.3        | 5786.8           | 787.6        |
| Protein (g)                         | 57.6             | 2.3          | 61.1             | 5.9          |
| Fat (g)                             | 49.3             | 6.6          | 59.5             | 16.7         |
| CHO (g)                             | 133.8            | 0.9          | 135.2            | 2.3          |
| Sugars (g)                          | 66.3             | 0.4          | 67.0             | 1.1          |
| Added sugars (g)                    | 26.5             | 0.0          | 26.5             | 0.0          |
| Free sugars (g)                     | 32.1             | 0.0          | 32.1             | 0.1          |
| Fibre (g)                           | 15.8             | 1.4          | 18.0             | 3.7          |
| Alcohol (g)                         | 4.5              | 0.0          | 4.5              | 0.0          |
| Retinol equivalents (µg)            | 603.6            | 0.4          | 604.2            | 0.9          |
| Total folate equivalents (µg)       | 348.8            | 8.5          | 362.0            | 21.7         |
| Vitamin B12 (µg)                    | 2.8              | 0.0          | 2.8              | 0.0          |
| Calcium (mg)                        | 561.4            | 22.0         | 595.3            | 55.9         |
| Iodine (µg)                         | 108.7            | 0.1          | 108.9            | 0.4          |
| Iron (mg)                           | 6.7              | 0.5          | 7.5              | 1.3          |
| Sodium (mg)                         | 1295.8           | 1.4          | 1298.0           | 3.6          |
| Zinc (mg)                           | 7.0              | 0.5          | 7.8              | 1.3          |
| Saturated fat (g)                   | 16.8             | 0.7          | 17.8             | 1.7          |
| Monounsaturated fat (g)             | 19.4             | 3.1          | 24.2             | 7.9          |
| Linoleic acid (g)                   | 7.6              | 2.2          | 11.0             | 5.7          |
| Alpha linolenic acid (g)            | 1.0              | 0.3          | 1.5              | 0.7          |
| Long chain omega 3 fatty acids (mg) | 175.3            | 0.0          | 175.3            | 0.0          |
| Glycemic Index                      | 53.9             | 22.2         | 53.6             | 21.7         |
| Glycemic Load                       | 71.8             | 0.2          | 72.1             | 0.5          |

<sup>1</sup>Including ultra-processed and processed foods

**Table S6:** Modelled nutrients following a reduction in PF<sup>1</sup> by 50% and increasing fruit consumption by 225 g/day.

| Nutrient                            | Modelled intakes | Total PF <sup>1</sup> | MP <sup>2</sup> | PCI <sup>3</sup> | Fruit  |
|-------------------------------------|------------------|-----------------------|-----------------|------------------|--------|
| Energy including fibre (kJ)         | 5690             | 2554.9                | 1855.8          | 245.0            | 1034.3 |
| Protein (g)                         | 57.6             | 23.3                  | 31.1            | 0.1              | 3.2    |
| Fat (g)                             | 45.0             | 22.7                  | 17.5            | 3.6              | 1.2    |
| CHO (g)                             | 164.5            | 67.9                  | 37.6            | 6.8              | 52.2   |
| Sugars (g)                          | 94.9             | 26.2                  | 14.1            | 6.8              | 47.9   |
| Added sugars (g)                    | 31.8             | 18.6                  | 0.7             | 5.6              | 7.0    |
| Free sugars (g)                     | 43               | 19.3                  | 0.7             | 6.8              | 16.2   |
| Fibre (g)                           | 19.1             | 5.9                   | 5.4             | 0.0              | 7.8    |
| Alcohol (g)                         | 4.5              | 4.5                   | 0.0             | 0.0              | 0.0    |
| Retinol equivalents (µg)            | 699.1            | 172.1                 | 349.5           | 14.1             | 163.2  |
| Total folate equivalents (µg)       | 398.3            | 188.3                 | 113             | 0.2              | 96.9   |
| Vitamin B12 (µg)                    | 2.8              | 0.9                   | 1.9             | 0.0              | 0.0    |
| Calcium (mg)                        | 575              | 214.9                 | 306.3           | 2.3              | 51.5   |
| Iodine (µg)                         | 113.3            | 43.7                  | 62.1            | 0.4              | 7.0    |
| Iron (mg)                           | 7.0              | 3.2                   | 2.6             | 0.0              | 1.1    |
| Sodium (mg)                         | 1310.1           | 913.1                 | 341.6           | 32.4             | 23.1   |
| Zinc (mg)                           | 6.9              | 2.7                   | 3.6             | 0.0              | 0.5    |
| Saturated fat (g)                   | 16.4             | 8.9                   | 6.2             | 1.1              | 0.1    |
| Monounsaturated fat (g)             | 17.2             | 8.5                   | 7.0             | 1.4              | 0.3    |
| Linoleic acid (g)                   | 6.0              | 3.0                   | 2.1             | 0.7              | 0.2    |
| Alpha linolenic acid (g)            | 0.8              | 0.5                   | 0.2             | 0.1              | 0.0    |
| Long chain omega 3 fatty acids (mg) | 175.3            | 57.9                  | 115.9           | 1.5              | 0.0    |
| Glycemic Index                      | 52.9             | 56.0                  | 53.0            | 63.2             | 47.1   |
| Glycemic Load                       | 86.3             | 38.0                  | 19.9            | 4.3              | 24.1   |

<sup>1</sup>Including ultra-processed and processed foods; <sup>2</sup>Unprocessed/minimally processed foods; <sup>3</sup>Processed culinary ingredients

**Table S7:** Modelled nutrients following a reduction in PF<sup>1</sup> by 50% and increasing vegetable consumption by 225 g/day.

| Nutrient                            | Modelled intakes | Total PF <sup>1</sup> | MP <sup>2</sup> | PCI <sup>3</sup> | Vegetables |
|-------------------------------------|------------------|-----------------------|-----------------|------------------|------------|
| Energy including fibre (kJ)         | 5574.5           | 2590.6                | 1879.0          | 245.0            | 859.8      |
| Protein (g)                         | 60.9             | 23.4                  | 28.7            | 0.1              | 8.7        |
| Fat (g)                             | 47.9             | 22.8                  | 15.3            | 3.6              | 6.2        |
| CHO (g)                             | 147.3            | 69.9                  | 46.3            | 6.8              | 24.3       |
| Sugars (g)                          | 74.1             | 28.1                  | 25.3            | 6.8              | 13.9       |
| Added sugars (g)                    | 26.5             | 20.0                  | 0.9             | 5.6              | 0.0        |
| Free sugars (g)                     | 36.7             | 21.0                  | 0.9             | 6.8              | 8.0        |
| Fibre (g)                           | 19.4             | 5.9                   | 5.3             | 0.0              | 8.1        |
| Alcohol (g)                         | 4.5              | 4.5                   | 0.0             | 0.0              | 0.0        |
| Retinol equivalents (µg)            | 954.9            | 175.7                 | 164.9           | 14.1             | 600.1      |
| Total folate equivalents (µg)       | 420.2            | 189.8                 | 97.2            | 0.2              | 133.1      |
| Vitamin B12 (µg)                    | 2.9              | 0.9                   | 1.8             | 0.0              | 0.1        |
| Calcium (mg)                        | 598.2            | 216.3                 | 287.9           | 2.3              | 91.7       |
| Iodine (µg)                         | 112.9            | 44.4                  | 60.6            | 0.4              | 7.5        |
| Iron (mg)                           | 7.5              | 3.3                   | 2.2             | 0.0              | 1.9        |
| Sodium (mg)                         | 1368             | 915.5                 | 294.9           | 32.4             | 125.2      |
| Zinc (mg)                           | 7.4              | 2.7                   | 3.2             | 0.0              | 1.4        |
| Saturated fat (g)                   | 17.2             | 9.0                   | 5.6             | 1.1              | 1.5        |
| Monounsaturated fat (g)             | 18.7             | 8.5                   | 5.9             | 1.4              | 2.9        |
| Linoleic acid (g)                   | 6.4              | 3.0                   | 1.8             | 0.7              | 0.9        |
| Alpha linolenic acid (g)            | 0.9              | 0.5                   | 0.2             | 0.1              | 0.1        |
| Long chain omega 3 fatty acids (mg) | 186.0            | 57.9                  | 108.3           | 1.5              | 18.4       |
| Glycemic Index                      | 54.1             | 55.9                  | 50.2            | 63.2             | 54.3       |
| Glycemic Load                       | 79.3             | 39.0                  | 23.0            | 4.3              | 13.1       |

<sup>1</sup>Including ultra-processed and processed foods; <sup>2</sup>Unprocessed/minimally processed foods; <sup>3</sup>Processed culinary ingredients

**Table S8:** Modelled nutrients following a reduction in PF by 50% and increasing fruit by 150 g/d, vegetables by 225 g/d, and nuts by 40 g/d.

| Nutrient                            | Modelled intakes | Total PF <sup>1</sup> | MP <sup>2</sup> | PCI <sup>3</sup> | Fruit | Vegetables | Nuts   |
|-------------------------------------|------------------|-----------------------|-----------------|------------------|-------|------------|--------|
| Energy including fibre (kJ)         | 6932.9           | 2554.9                | 1494.1          | 245              | 931.3 | 681.4      | 1026.2 |
| Protein (g)                         | 68.9             | 23.3                  | 27.2            | 0.1              | 2.9   | 7.8        | 7.7    |
| Fat (g)                             | 68.6             | 22.7                  | 13.4            | 3.6              | 1     | 6          | 21.8   |
| CHO (g)                             | 171.2            | 67.9                  | 30.6            | 6.8              | 47    | 15.7       | 3      |
| Sugars (g)                          | 94.8             | 26.2                  | 11.5            | 6.8              | 43.1  | 5.8        | 1.4    |
| Added sugars (g)                    | 31.1             | 18.6                  | 0.6             | 5.6              | 6.3   | 0          | 0      |
| Free sugars (g)                     | 41.5             | 19.3                  | 0.7             | 6.8              | 14.6  | 0          | 0.1    |
| Fibre (g)                           | 26.8             | 5.9                   | 2.1             | 0                | 7     | 7          | 4.8    |
| Alcohol (g)                         | 4.5              | 4.5                   | 0.0             | 0.0              | 0.0   | 0.0        | 0.0    |
| Retinol equivalents (µg)            | 992.2            | 172.1                 | 120.9           | 14.1             | 147   | 536.8      | 1.2    |
| Total folate equivalents (µg)       | 467.1            | 188.3                 | 72.4            | 0.2              | 87.2  | 90.7       | 28.3   |
| Vitamin B12 (µg)                    | 2.9              | 0.9                   | 1.8             | 0                | 0     | 0.1        | 0      |
| Calcium (mg)                        | 682              | 214.9                 | 268.4           | 2.3              | 46.4  | 77.2       | 72.9   |
| Iodine (µg)                         | 116              | 43.7                  | 59.9            | 0.4              | 6.3   | 5.2        | 0.5    |
| Iron (mg)                           | 9.5              | 3.2                   | 1.8             | 0                | 1     | 1.7        | 1.7    |
| Sodium (mg)                         | 1378.9           | 913.1                 | 291.8           | 32.4             | 20.8  | 116.2      | 4.7    |
| Zinc (mg)                           | 9.2              | 2.7                   | 2.9             | 0                | 0.5   | 1.3        | 1.7    |
| Saturated fat (g)                   | 19.3             | 8.9                   | 5.4             | 1.1              | 0.1   | 1.5        | 2.2    |
| Monounsaturated fat (g)             | 28.3             | 8.5                   | 5.1             | 1.4              | 0.2   | 2.8        | 10.3   |
| Linoleic acid (g)                   | 13.3             | 3                     | 1.2             | 0.7              | 0.2   | 0.8        | 7.4    |
| Alpha linolenic acid (g)            | 1.8              | 0.5                   | 0.1             | 0.1              | 0     | 0.1        | 1      |
| Long chain omega 3 fatty acids (mg) | 185.6            | 57.9                  | 108.3           | 1.5              | 0     | 17.9       | 0      |
| Glycemic Index                      | 52.8             | 56.0                  | 52.3            | 63.2             | 47.2  | 57.7       | 20.0   |
| Glycemic Load                       | 91.9             | 38.0                  | 16.0            | 4.3              | 21.7  | 11.6       | 0.3    |

<sup>1</sup>Including ultra-processed and processed foods; <sup>2</sup>Unprocessed/minimally processed foods; <sup>3</sup>Processed culinary ingredient

**Table S9:** Modelled nutrients when replacing oils containing high level of SFA with oils containing high omega 3 FAs.

| <b>Nutrient</b>               | <b>Replacement with 5 g/d<br/>of high omega 3 oils</b> | <b>Replacement with 10 g/d<br/>of high omega 3 oils</b> | <b>Replacement with 15 g/d<br/>of high omega 3 oils</b> | <b>Replacement with 20 g/d<br/>of high omega 3 oils</b> |
|-------------------------------|--------------------------------------------------------|---------------------------------------------------------|---------------------------------------------------------|---------------------------------------------------------|
| Energy including fibre (kJ)   | 5230.3                                                 | 5393.1                                                  | 5555.9                                                  | 5718.7                                                  |
| Protein (g)                   | 55.8                                                   | 55.8                                                    | 55.8                                                    | 55.8                                                    |
| Fat (g)                       | 48.6                                                   | 53.0                                                    | 57.4                                                    | 61.8                                                    |
| CHO (g)                       | 133.1                                                  | 133.1                                                   | 133.1                                                   | 133.1                                                   |
| Sugars (g)                    | 65.9                                                   | 65.9                                                    | 65.9                                                    | 65.9                                                    |
| Added sugars (g)              | 26.5                                                   | 26.5                                                    | 26.5                                                    | 26.5                                                    |
| Free sugars (g)               | 32.0                                                   | 32.0                                                    | 32.0                                                    | 32.0                                                    |
| Fibre (g)                     | 14.6                                                   | 14.6                                                    | 14.6                                                    | 14.6                                                    |
| Alcohol (g)                   | 4.5                                                    | 4.5                                                     | 4.5                                                     | 4.5                                                     |
| Retinol equivalents (µg)      | 604.7                                                  | 607.0                                                   | 609.3                                                   | 611.6                                                   |
| Total folate equivalents (µg) | 342.2                                                  | 342.2                                                   | 342.3                                                   | 342.3                                                   |
| Vitamin B12 (µg)              | 2.8                                                    | 2.8                                                     | 2.8                                                     | 2.8                                                     |
| Calcium (mg)                  | 544.5                                                  | 544.5                                                   | 544.5                                                   | 544.5                                                   |
| Iodine (µg)                   | 108.6                                                  | 108.6                                                   | 108.6                                                   | 108.6                                                   |
| Iron (mg)                     | 6.3                                                    | 6.3                                                     | 6.3                                                     | 6.3                                                     |
| Sodium (mg)                   | 1295.2                                                 | 1296.4                                                  | 1297.6                                                  | 1298.7                                                  |
| Zinc (mg)                     | 6.6                                                    | 6.6                                                     | 6.6                                                     | 6.6                                                     |
| Saturated fat (g)             | 16.9                                                   | 17.6                                                    | 18.2                                                    | 18.9                                                    |
| Monounsaturated fat (g)       | 20.0                                                   | 22.9                                                    | 25.9                                                    | 28.9                                                    |
| Linoleic acid (g)             | 6.3                                                    | 6.7                                                     | 7.1                                                     | 7.6                                                     |

|                                     |       |       |       |       |
|-------------------------------------|-------|-------|-------|-------|
| Alpha linolenic acid (g)            | 0.9   | 1.1   | 1.2   | 1.3   |
| Long chain omega 3 fatty acids (mg) | 175.2 | 175.2 | 175.2 | 175.2 |
| Glycemic Index                      | 54.1  | 54.1  | 54.1  | 54.1  |
| Glycemic Load                       | 71.7  | 71.7  | 71.7  | 71.7  |
